# Supplementary material
Source: publisher figshare collection journal article supplement (https://tandf.figshare.com/articles/dataset/_/20584229)
Supplement: Supplementary file 1 [file 1]

## Sheet: Legend
Supplementary Table S2: Analysis of DNA sequences at ZBTB38 binding sites
A) List of known motifs enriched at the 3032 ZBTB38 binding sites compared to the rest of the genome.
B) List of new motifs enriched at the 3032 ZBTB38 binding sites.

## Sheet: Motif enrichment
A) List of known motifs.
Rank	Name	P-value	q-value (Benjamini)	# Target Sequences with Motif	% of Targets Sequences with Motif	Logo
1	CTCF(Zf)/CD4+-CTCF-ChIP-Seq(Barski et al.)/Homer	1e-36	0.0000	144.0	4.75%
2	BORIS(Zf)/K562-CTCFL-ChIP-Seq(GSE32465)/Homer	1e-22	0.0000	180.0	5.94%
3	BMYB(HTH)/Hela-BMYB-ChIP-Seq(GSE27030)/Homer	1e-07	0.0000	807.0	26.62%
4	MYB(HTH)/ERMYB-Myb-ChIPSeq(GSE22095)/Homer	1e-07	0.0000	902.0	29.75%
5	Mef2c(MADS)/GM12878-Mef2c-ChIP-Seq(GSE32465)/Homer	1e-05	0.0001	882.0	29.09%
6	E2F6(E2F)/Hela-E2F6-ChIP-Seq(GSE31477)/Homer	1e-05	0.0002	337.0	11.11%
7	E2F4(E2F)/K562-E2F4-ChIP-Seq(GSE31477)/Homer	1e-05	0.0002	294.0	9.70%
8	HNF6(Homeobox)/Liver-Hnf6-ChIP-Seq(ERP000394)/Homer	0.0001	0.0010	362.0	11.94%
9	AMYB(HTH)/Testes-AMYB-ChIP-Seq(GSE44588)/Homer	0.0001	0.0017	761.0	25.10%
10	GSC(Homeobox)/FrogEmbryos-GSC-ChIP-Seq(DRA000576)/Homer	0.0001	0.0017	1415.0	46.67%
11	MafK(bZIP)/C2C12-MafK-ChIP-Seq(GSE36030)/Homer	0.001	0.0041	142.0	4.68%
12	E2F1(E2F)/Hela-E2F1-ChIP-Seq(GSE22478)/Homer	0.001	0.0070	189.0	6.23%
13	CEBP:AP1(bZIP)/ThioMac-CEBPb-ChIP-Seq(GSE21512)/Homer	0.001	0.0081	457.0	15.07%
14	Mef2a(MADS)/HL1-Mef2a.biotin-ChIP-Seq(GSE21529)/Homer	0.001	0.0081	770.0	25.40%
15	Bach1(bZIP)/K562-Bach1-ChIP-Seq(GSE31477)/Homer	0.01	0.0272	33.0	1.09%
16	Nkx6.1(Homeobox)/Islet-Nkx6.1-ChIP-Seq(GSE40975)/Homer	0.01	0.0298	1420.0	46.83%
17	Jun-AP1(bZIP)/K562-cJun-ChIP-Seq(GSE31477)/Homer	0.01	0.0298	124.0	4.09%
18	LXRE(NR),DR4/RAW-LXRb.biotin-ChIP-Seq(GSE21512)/Homer	0.01	0.0320	242.0	7.98%
19	Nrf2(bZIP)/Lymphoblast-Nrf2-ChIP-Seq(GSE37589)/Homer	0.01	0.0320	32.0	1.06%
20	IRF1(IRF)/PBMC-IRF1-ChIP-Seq(GSE43036)/Homer	0.01	0.0333	105.0	3.46%
21	THRa(NR)/C17.2-THRa-ChIP-Seq(GSE38347)/Homer	0.01	0.0457	481.0	15.86%
22	REST-NRSF(Zf)/Jurkat-NRSF-ChIP-Seq/Homer	0.01	0.0479	10.0	0.33%
23	Pitx1(Homeobox)/Chicken-Pitx1-ChIP-Seq(GSE38910)/Homer	0.01	0.0479	2378.0	78.43%
24	Fosl2(bZIP)/3T3L1-Fosl2-ChIP-Seq(GSE56872)/Homer	0.01	0.0479	160.0	5.28%
25	Bach2(bZIP)/OCILy7-Bach2-ChIP-Seq(GSE44420)/Homer	0.01	0.0561	95.0	3.13%
26	NF-E2(bZIP)/K562-NFE2-ChIP-Seq(GSE31477)/Homer	0.01	0.0571	34.0	1.12%
27	E2F7(E2F)/Hela-E2F7-ChIP-Seq(GSE32673)/Homer	0.01	0.0619	88.0	2.90%
28	Rfx5(HTH)/GM12878-Rfx5-ChIP-Seq(GSE31477)/Homer	0.01	0.0784	195.0	6.43%
29	Atf4(bZIP)/MEF-Atf4-ChIP-Seq(GSE35681)/Homer	0.01	0.0852	188	0.0522

## Sheet: De novo
B) List of new motifs.
Motif	P-value	% of Targets	% of Background	Best Match/Details	Logo
M1	1e-453	59.99%	21.63%	PH0044.1_Homez/Jaspar(0.785)
M2	1e-198	77.80%	51.29%	E2F4(E2F)/K562-E2F4-ChIP-Seq(GSE31477)/Homer(0.747)
M3	1e-64	18.27%	8.45%	PB0139.1_Irf5_2/Jaspar(0.758)
M4	1e-37	25.73%	16.45%	POL006.1_BREu/Jaspar(0.599)
M5	1e-37	50.30%	38.73%	PB0179.1_Sp100_2/Jaspar(0.647)
M6	1e-36	11.41%	5.45%	MA0597.1_THAP1/Jaspar(0.636)
M7	1e-34	19.59%	11.73%	POL013.1_MED-1/Jaspar(0.682)
M8	1e-21	9.23%	5.03%	MA0130.1_ZNF354C/Jaspar(0.589)
M9	1e-20	37.20%	29.18%	Smad4(MAD)/ESC-SMAD4-ChIP-Seq(GSE29422)/Homer(0.736)
M10	1e-20	17.41%	11.55%	MA0095.2_YY1/Jaspar(0.662)
M11	1e-20	4.35%	1.71%	PRDM1(Zf)/Hela-PRDM1-ChIP-Seq(GSE31477)/Homer(0.685)
M12	1e-17	14.61%	9.67%	MA0019.1_Ddit3::Cebpa/Jaspar(0.762)
M13	1e-17	12.43%	7.92%	PB0113.1_E2F3_2/Jaspar(0.547)
M14	1e-15	3.73%	1.55%	PB0137.1_Irf3_2/Jaspar(0.683)
M15	1e-14	5.87%	3.09%	PB0138.1_Irf4_2/Jaspar(0.717)
M16	1e-14	8.18%	4.83%	MA0103.2_ZEB1/Jaspar(0.626)
M17	1e-13	7.42%	4.39%	MA0051.1_IRF2/Jaspar(0.628)
